# Supplementary material for: Protective Effects of Scutellarin on Human Cardiac Microvascular Endothelial Cells against Hypoxia-Reoxygenation Injury and Its Possible Target-Related Proteins
Source: Hindawi journal article supplement (doi:10.1155/2015/278014), 2015-01-01
Supplement: f1 [file 278014.f1.pdf]

**Supplementary Table 1.** The information of abbreviated genes names and their corresponding protein full names of proteins showed in Figure 5

| Abbreviated gene              | Protein full names                                                                    |
|-------------------------------|---------------------------------------------------------------------------------------|
| names (in alphabetical order) |                                                                                       |
| ALB                           | albumin-like                                                                          |
| ANXA5                         | Chain A, Structural And Electrophysiological Analysis Of Annexin V Mutants            |
| ATP6V1B2                      | ATPase, H <sup>+</sup> transporting, lysosomal 56/58kDa, V1 subunit B2, isoform CRA_a |
| CCT6A                         | chaperonin containing TCP1, subunit 6A isoform a variant                              |
| COPS4                         | COP9 complex subunit 4                                                                |
| EF1G                          | eukaryotic translation elongation factor 1 gamma, isoform CRA_d                       |
| EIF3K                         | eukaryotic translation initiation factor 3, subunit 12, isoform CRA_b                 |
| EIF6                          | p27BBP protein                                                                        |
| GSTP1                         | Glutathione S-transferase P                                                           |
| HSPA1A                        | heat shock protein                                                                    |
| HSPD1                         | heat shock 60kDa protein 1 (chaperonin), isoform CRA_c                                |
| IDH3A                         | Isocitrate dehydrogenase 3 (NAD <sup>+</sup> ) alpha                                  |
| ITGA3                         | VLA-3 alpha subunit                                                                   |

|       |                                                                        |
|-------|------------------------------------------------------------------------|
| NUDT5 | Chain B, Crystal Structure Of Human Nudt5 Complexed<br>With 8-Oxo-Dgmp |
| PPA1  | Inorganic pyrophosphatase                                              |
| REXO2 | CGI-114 protein                                                        |
| SFN   | Chain A, 14-3-3 Sigma In Complex With Yap Ps127-Peptide                |
| SRI   | sorcini isoform b                                                      |

---
